# Supplementary material for: Occurrence of 80 per and polyfluorinated alkyl substances (PFAS) in muscle and liver tissues of marine mammals of the St. Lawrence Estuary and Gulf, Quebec, Canada
Source: Frontiers journal article supplement (doi:10.3389/fenvc.2024.1403728), 2024-07-04
Supplement: Table_1.XLSX [file Table_1.XLSX]

## Sheet: Muscle 
					Concentration ng/g (wet weight)
No	Species	Sample type	Weight (kg)	Location	Σ77PFAS	Cl-PFOS	PFPrA	PFEtS	PFBA	PFPeA	PFMPA	PFPrS	PFMBA	4_2_FTS	PFHxPA	3,6-OPFHpA	PFBS	PFHxA	5_3-FtB	Gen-X	5_1_2-FtB	PFEESA	3_3-Acid	PFHpA	PFPeS	FBSA	ADONA	PFHxSAm	PFHxSAmS	6_2-FTS	6_2-FTAB	PFOAB	PFOANO	PFOPA	4_3-acid	PFOA	PFHxS	MeFBSA	PFOSAm	PFOSNO	PFOSAmS	PFNA	5_3-Acid	PFECHS	PFOSB	PFHpS	6_2-FTUCA	8_2-FTS	FHxSA
1	Harbor seal	Muscle	11,94	Rimouski	29.7985	_	_	_	_	0.0358843	_	_	_	_	_	_	_	_	_	_	_	_	_	_	_	_	_	_	_	_	_	_	_	_	_	0.103852	1.03215	_	_	_	_	0.862008	_	0.265032	_	0.224239	_	_	_
2	Harbor porpoise	Muscle	9.72	Trois-Pistoles	49.4972	_	_	_	_	_	_	_	_	_	_	_	_	_	_	_	_	_	_	_	_	0.581909	_	_	_	2.5219	_	_	_	_	_	0.215835	0.465811	_	_	_	_	1.80158	2.14679	0.0566409	_	0.10797	_	_	0.145835
3	Harbor seal	Muscle	7.2	Métis-sur-Mer	20.832	_	_	_	_	_	_	_	_	_	_	_	_	_	_	_	_	_	_	_	_	_	_	_	_	_	_	_	_	_	_	0.0856827	0.590897	_	_	_	_	0.171447	_	0.0938385	_	0.142334	_	_	_
4	Grey seal	Muscle	128	Sainte-Anne-des-Monts	13.5646	_	_	_	_	_	_	_	_	_	_	_	_	_	_	_	_	_	_	_	_	_	_	_	_	2.83712	_	_	_	_	_	0.0380889	0.0613678	_	_	_	_	0.517392	_	_	_	0.0309993	_	_	_
5	Harbor porpoise	Muscle	40	Cloridorme	17.8002	_	_	_	_	_	_	_	_	_	_	_	_	_	_	_	_	_	_	_	_	0.856998	_	_	_	_	_	_	_	_	_	0.0815449	0.0654234	_	_	_	_	0.264235	_	0.0203958	_	_	_	_	0.219646
6	White-beaked dolphin	Muscle	ND	Blanc-Sablon	29.9135	_	_	_	_	_	_	_	_	_	_	_	_	_	_	_	_	_	_	0.0713653	_	0.246842	_	_	_	_	_	_	_	_	_	0.705835	0.397792	_	_	_	_	2.86212	_	_	_	0.0528406	_	_	0.489309
7	Harbor porpoise	Muscle	11	Pointe-à-la-Croix	58.1758	_	_	_	_	_	_	_	_	_	_	_	_	_	_	_	_	_	_	0.0807038	_	0.699796	_	_	_	_	_	_	_	_	_	0.163578	0.258865	_	_	_	_	1.45124	1.11577	0.0699308	_	0.104393	_	_	0.188924
8	Harbor porpoise	Muscle	16	Pointe-aux-Outardes	6.92269	_	_	_	_	_	_	_	_	_	_	_	_	_	_	_	_	_	_	_	_	0.165285	_	_	_	_	_	_	_	_	_	0.10797	0.0499618	_	_	_	_	0.111089	_	_	_	_	_	_	0.145084
9	Harbor porpoise	Muscle	37	Sainte-Anne-des-Monts	14.5164	_	_	_	_	_	_	_	_	_	_	_	_	_	_	_	_	_	_	_	_	0.594855	_	_	_	_	_	_	_	_	_	0.0679489	0.0560559	_	_	_	_	0.388604	_	_	_	_	_	_	0.198925
10	Grey seal	Muscle	110	Cloridorme	23.2332	_	_	_	_	_	_	_	_	_	_	_	_	_	_	_	_	_	_	_	_	_	_	_	_	3.19715	_	_	_	_	_	_	0.220334	_	_	_	_	1.37402	_	_	_	0.0764908	_	_	0.0138535
11	Hooded seal	Muscle	19	Beaumont	24.1072	_	_	_	_	_	_	_	_	_	_	_	_	_	_	_	_	_	_	_	_	_	_	_	_	3.02347	_	_	_	_	_	0.2792	0.3002	_	_	_	_	1.60484	_	_	_	0.0444472	_	_	_
12	Harbor porpoise	Muscle	9.02	Colombier	54.5193	_	_	_	_	_	_	_	_	_	_	_	_	_	0.0567236	_	_	_	_	0.0689246	_	0.681041	_	_	_	_	_	_	_	_	_	0.156235	0.113821	_	_	_	_	1.46198	1.04513	0.0723144	_	0.0410743	_	_	0.142185
13	Harbor porpoise	Muscle	11.04	Rimouski	21.4872	_	_	_	_	_	_	_	_	_	_	_	_	_	_	_	_	_	_	_	_	0.123257	_	_	_	_	_	_	_	_	_	0.103885	0.117453	_	_	_	_	0.592555	0.389955	_	_	0.0519186	_	_	0.0310563
14	Harbor porpoise	Muscle	48	Baie-des-Sables	5.73355	_	_	_	_	_	_	_	_	_	_	_	_	_	_	_	_	_	_	_	_	0.127589	_	_	_	2.31802	_	_	_	_	_	0.0456176	_	_	_	_	_	0.0687178	_	_	_	_	_	_	_
15	Harbor porpoise	Muscle	6.28	Saint-Maxime-du-Mont-Louis	111.024	_	_	_	_	_	_	_	_	_	_	_	_	_	_	_	_	_	_	0.0689118	_	0.182076	_	_	_	2.77617	_	_	_	_	_	0.101821	0.301156	_	_	_	_	0.650946	8.77442	0.0276472	_	0.0860317	_	_	0.0676963
16	White-sided dolphin	Muscle	22.88	Rivière-du-Loup	34.2596	_	_	_	_	_	_	_	_	_	_	_	_	_	_	_	_	_	_	0.0435762	_	0.0776959	_	_	_	_	_	_	_	_	_	0.118199	0.200107	_	_	_	_	1.27974	_	_	_	0.0662408	_	_	0.441746
17	Harbor porpoise	Muscle	34	Matane	13.1456	_	_	_	_	_	_	_	_	_	_	_	_	_	_	_	_	_	_	0.0364725	_	0.59264	_	_	_	_	_	_	_	_	_	0.104077	0.100224	_	_	_	_	0.439611	_	_	_	0.0211446	_	_	0.140563
18	White-sided dolphin	Muscle	20.24	Les Bergeronnes	39.5734	_	_	_	_	_	_	_	_	_	_	_	_	_	_	_	_	_	_	_	_	0.0738154	_	_	_	2.94993	_	_	_	_	_	0.275619	0.438302	_	_	_	_	1.56908	_	_	_	0.117105	_	_	0.395103
19	True's beaked whale	Muscle	690	Sept-Îles	16.5595	_	_	_	_	_	_	_	_	_	_	_	_	_	_	_	_	_	_	_	_	_	_	_	0.062552	3.42552	_	_	_	_	_	0.0611811	_	_	_	_	_	0.403377	_	_	_	_	_	_	0.0696944
20	Harbor seal	Muscle	23	Rimouski	13.739	_	_	_	_	_	_	_	_	_	_	_	_	_	_	_	_	_	_	_	_	_	_	_	_	2.84238	_	_	_	_	_	0.164383	0.0670728	_	_	_	_	0.467134	_	_	_	_	_	_	0.0241832
21	Harbor porpoise	Muscle	8.94	Sainte-Anne-des-Monts	40.3475	_	_	_	_	_	_	_	_	0.0935848	_	_	_	_	_	_	_	_	_	0.070899	_	0.169274	_	_	_	2.55663	_	_	_	_	_	0.170756	0.301264	_	_	_	_	1.08132	0.966849	0.0840796	_	0.123824	_	_	0.0457278
22	White-sided dolphin	Muscle	17.6	Saint-Ulric	41.3766	_	_	_	_	_	_	_	_	0.0884622	_	_	_	_	_	_	_	_	_	_	_	0.0659372	_	_	_	2.57415	_	_	_	_	_	0.249862	0.23325	_	_	_	_	1.43749	0.298382	_	_	0.073134	_	_	0.250158
23	Harbor porpoise	Muscle	18	Rivière-Ouelle	23.4941	_	_	_	_	_	_	_	_	_	_	_	_	_	_	_	_	_	_	_	_	0.0880749	_	_	_	_	_	_	_	_	_	0.0796721	0.169138	_	_	_	_	0.859982	_	_	_	0.0642625	_	_	0.0285381
24	Harbor porpoise	Muscle	10	Les Escoumins	35.1139	_	_	_	_	_	_	_	_	_	_	_	_	_	_	_	_	_	_	_	_	0.0948733	_	_	_	2.95042	_	_	_	_	_	0.11572	0.0653608	_	_	_	_	1.30886	0.721151	_	_	0.0451902	_	_	_
25	Harbor seal	Muscle	8.08	Sept-Îles	36.7088	_	_	_	_	_	_	_	_	0.0929808	_	_	_	_	_	_	_	_	_	_	_	_	_	_	_	2.85719	_	_	_	_	_	0.245435	0.172749	_	_	_	_	1.33032	_	_	_	0.061528	_	_	0.0365299
26	White-sided dolphin	Muscle	20.8	Matane	43.2798	_	_	_	_	_	_	_	_	_	_	_	_	_	_	_	_	_	_	_	_	0.0887081	_	_	_	_	_	_	_	_	_	0.302238	0.267178	_	_	_	_	1.44244	0.240137	_	_	0.0846199	_	_	0.405837
27	Harbor porpoise	Muscle	10.62	Rimouski	32.4513	_	_	_	_	_	_	_	_	_	_	_	_	_	_	_	_	_	_	0.0509575	_	0.0863363	_	_	_	_	_	_	_	_	_	0.218153	0.156479	_	_	_	_	0.57859	0.651038	0.0406431	_	0.0742938	_	_	0.0282473
28	Harbor porpoise	Muscle	82.57	Sainte-Anne-des-Monts	58.1408	_	_	_	_	_	_	_	_	0.657928	_	_	_	0.404385	_	_	_	_	_	_	_	0.454279	_	_	_	_	_	_	_	_	_	0.129507	0.340268	_	_	_	_	1.92247	0.624895	0.0492393	_	0.10367	_	_	0.0928969
29	Harbor porpoise	Muscle	11.52	Les Escoumins	56.0801	_	_	_	_	_	_	_	_	_	_	_	_	_	_	_	_	_	_	_	_	0.765351	_	_	_	_	_	_	_	_	_	0.135795	0.320423	_	_	_	_	1.16111	1.34421	0.0934848	_	0.0913901	_	_	0.212023
30	Harbor porpoise	Muscle	10.86	Rimouski	30.4332	_	0.426981	_	_	_	_	_	_	_	_	_	_	_	_	_	_	_	_	_	_	0.143977	_	_	_	_	_	_	_	_	_	0.247385	0.255777	_	_	_	_	1.21189	0.347942	0.0881818	_	0.0824007	_	_	0.0804141
31	Harbor porpoise	Muscle	13.08	Rimouski	34.3834	_	_	_	_	_	_	_	_	_	_	_	_	_	_	_	_	_	_	_	_	0.227933	_	_	_	3.21971	_	_	_	_	_	0.0667294	0.169477	_	_	_	_	1.06661	0.713742	0.0318566	_	0.0617891	_	_	0.139599
32	White-sided dolphin	Muscle	47.68	Percé	26.4895	_	_	_	_	_	_	_	_	_	_	_	_	_	_	_	_	_	_	_	_	0.0726878	_	_	_	2.88724	_	_	_	_	_	0.0671031	0.151676	_	_	_	_	0.430577	_	_	_	0.049218	_	_	0.398234
33	Harbor porpoise	Muscle	13.32	Rivière-du-Loup	77.677	_	0.541333	_	_	_	_	_	_	0.0842046	_	_	_	_	_	_	_	_	_	_	_	1.32809	_	_	_	_	_	_	_	_	_	0.147449	1.01852	_	_	_	_	2.95775	0.362152	0.479396	_	0.402673	_	_	1.34324
34	Harbor porpoise	Muscle	12.58	Port-Cartier	34.1826	_	_	_	_	_	_	_	_	_	_	_	_	_	_	_	_	_	_	_	_	0.168153	_	_	_	_	_	_	_	_	_	0.0967716	0.274612	_	_	_	_	0.635013	0.387461	0.0654122	_	0.11425	_	_	0.0387698
35	White-sided dolphin	Muscle	27	Sept-Îles	47.6918	_	_	_	_	_	_	_	_	_	_	_	_	_	_	_	_	_	_	0.0534243	_	0.0619137	_	_	_	_	_	_	_	_	_	0.257741	0.472995	_	_	_	_	2.41416	_	0.0611129	_	0.126689	_	_	0.325724
36	Harbor porpoise	Muscle	38	Havre-Saint-Pierre	8.66929	_	_	_	_	_	_	_	_	_	_	_	_	_	_	_	_	_	_	_	_	0.268597	_	_	_	_	_	_	_	_	_	0.0529973	_	_	_	_	_	0.0795706	_	_	_	_	_	_	0.0313526
37	Harp seal	Muscle	37	Matane	7.12255	0.00497295	_	_	_	_	_	_	_	0.126772	_	_	_	_	_	_	_	_	_	_	_	_	_	_	_	3.84536	_	_	_	_	_	0.0561916	0.0742337	_	_	_	_	0.300134	_	_	_	_	_	_	0.0119552
38	Harbor seal	Muscle	46	Sainte-Félicité	11.0943	_	_	_	_	_	_	_	_	_	_	_	_	_	_	_	_	_	_	_	_	_	_	_	_	_	_	_	_	_	_	0.0864696	0.0810405	_	_	_	_	0.355628	_	_	_	0.0293326	_	_	_
39	Harbor porpoise	Muscle	15	Rimouski	28.051	_	_	_	_	_	_	_	_	_	_	_	_	_	_	_	_	_	_	_	_	0.402661	_	_	_	2.4795	_	_	_	_	_	_	0.0806943	_	_	_	_	0.328418	0.747496	0.0474066	_	0.0633016	_	_	0.0970376
[truncated: 36 more columns]

## Sheet: Liver
					Concentration ng/g (wet weight)
No	Species	Sample type	Weight (kg)	Location	Σ77PFAS	Cl-PFOS	PFPrA	PFEtS	PFBA	PFPeA	PFMPA	PFPrS	PFMBA	4_2_FTS	PFHxPA	3,6-OPFHpA	PFBS	PFHxA	5_3-FtB	Gen-X	5_1_2-FtB	PFEESA	3_3-Acid	PFHpA	PFPeS	FBSA	ADONA	PFHxSAm	PFHxSAmS	6_2-FTS	6_2-FTAB	PFOAB	PFOANO	PFOPA	4_3-acid	PFOA	PFHxS	MeFBSA	PFOSAm	PFOSNO	PFOSAmS	PFNA	5_3-Acid	PFECHS	PFOSB	PFHpS	6_2-FTUCA	8_2-FTS	FHxSA
40	Harbor seal	Liver	11,94	Rimouski	278.567	_	_	_	1.15215	_	_	_	_	_	_	_	_	0.433358	_	_	_	_	_	_	_	_	_	_	_	75.8195	_	_	_	_	_	0.676127	3.4677	_	_	_	_	4.93338	_	1.28303	_	0.98275	_	_	0.0577607
41	Harbor porpoise	Liver	9.72	Trois-Pistoles	256.516	_	_	_	2.15121	_	_	_	_	_	_	_	_	_	_	_	_	_	_	_	_	1.17457	_	_	_	_	_	_	_	_	_	0.381674	1.18117	_	_	_	_	9.4716	15.0959	0.134122	_	0.218079	_	_	0.226795
42	Harbor seal	Liver	7.2	Métis-sur-Mer	122.408	_	_	_	0.420154	_	_	_	_	_	_	_	_	_	_	_	_	_	_	_	_	_	_	_	_	_	_	_	_	_	_	0.214333	2.58208	_	_	_	_	1.18151	_	0.521167	_	0.726799	_	_	_
43	Gray seal	Liver	128	Sainte-Anne-des-Monts	91.0613	_	_	_	1.89941	_	_	_	_	_	_	_	_	_	_	_	_	_	_	_	_	0.0545039	_	_	_	0.123752	_	_	_	_	_	0.254394	0.126147	_	_	_	_	5.57796	_	0.060777	_	0.153851	_	_	0.0488731
44	Harbor porpoise	Liver	40	Cloridorme	216.17	_	_	_	2.04929	_	_	_	_	_	_	_	_	_	_	_	_	_	_	0.111983	_	4.178	_	_	_	0.0981265	_	_	_	_	_	0.213842	0.304771	_	_	_	_	2.61867	_	0.257367	_	0.110184	_	_	1.22427
45	White-beaked dolphin	Liver	ND	Blanc-Sablon	330.342	_	_	_	0.350807	_	_	_	_	_	_	_	_	_	_	_	_	_	_	0.541599	_	1.35048	_	_	_	0.0984971	_	_	_	_	_	4.98947	2.86298	_	_	_	_	31.1926	0.315705	0.203254	_	0.890908	_	_	3.3351
46	Harbor porpoise	Liver	11	Pointe-à-la-Croix	254.085	_	_	_	0.529903	_	_	_	_	_	_	_	_	_	_	_	_	_	_	0.179233	_	1.01332	_	_	_	0.0663802	_	_	_	_	_	0.307943	0.569711	_	_	_	_	5.39001	3.65569	0.259853	_	0.380175	_	_	0.325549
47	Harbor porpoise	Liver	16	Pointe-aux-Outardes	121.323	_	_	_	1.09378	_	_	_	_	0.100607	_	_	_	_	_	_	_	_	_	0.1232	_	1.06739	_	_	_	22.5636	_	_	0.0503896	_	_	0.21013	0.273598	_	_	_	_	1.84895	_	0.045961	_	0.155303	_	_	0.694812
48	Harbor porpoise	Liver	37	Sainte-Anne-des-Monts	186.23	_	_	_	0.632754	_	_	_	_	_	_	_	_	_	_	_	_	_	_	0.14527	_	5.63872	_	_	_	_	_	_	_	_	_	0.298601	0.309145	_	_	_	_	3.60161	0.459697	0.188798	_	0.138224	_	_	2.88311
49	Gray seal	Liver	110	Cloridorme	110.379	_	_	_	4.44978	_	_	_	_	_	_	_	_	_	_	_	_	_	_	_	_	_	_	_	_	3.10071	_	_	_	_	_	0.139837	0.221882	_	_	_	_	6.23726	_	_	_	0.0985678	_	_	_
50	Hooded seal	Liver	19	Beaumont	126.311	_	_	_	2.27489	_	_	_	_	_	_	_	_	_	_	_	_	_	_	0.143572	_	_	_	_	_	0.0594795	_	_	_	_	_	0.776642	0.684782	_	_	_	_	11.7192	_	_	_	0.265928	_	_	_
51	Harbor porpoise	Liver	9.02	Colombier	330.261	_	_	_	0.94897	_	_	_	_	_	_	_	_	_	_	_	_	_	_	0.425393	_	1.50064	_	_	_	0.116237	_	_	_	_	_	0.314906	0.141509	_	_	_	_	7.13485	7.55372	_	_	0.0901601	_	_	0.247132
52	Harbor porpoise	Liver	11.04	Rimouski	459.962	_	_	_	0.67897	_	_	_	_	_	_	_	_	_	_	_	_	_	_	0.0993317	_	0.903071	_	_	_	0.0895324	_	_	_	_	_	0.448797	0.621898	_	_	_	_	11.1671	2.67437	0.38293	_	0.558134	_	_	0.229909
53	Harbor porpoise	Liver	48	Baie-des-Sables	81.1522	_	_	_	0.248381	_	_	_	_	_	_	_	_	_	_	_	_	_	_	_	_	0.711094	_	_	_	_	_	_	_	_	_	0.235237	_	_	_	_	_	1.97312	_	_	_	_	_	_	_
54	Harbor porpoise	Liver	6.28	Saint-Maxime-du-Mont-Louis	426.282	_	_	_	1.79829	_	_	_	_	_	_	_	_	_	_	_	_	_	_	_	_	0.551859	_	_	_	_	_	_	_	_	_	_	1.09833	_	_	_	_	4.45191	32.6536	_	_	0.533575	_	_	0.22093
55	White-sided dolphin	Liver	22.88	Rivière-du-Loup	271.835	_	_	_	0.215712	_	_	_	_	_	_	_	_	_	_	_	_	_	_	_	_	0.435465	_	_	_	1.5723	_	_	_	_	_	0.842733	1.14991	_	_	_	_	9.43027	1.64113	0.155351	_	0.382532	_	_	1.9428
56	Harbor porpoise	Liver	34	Matane	171.009	_	_	_	0.447999	_	_	_	_	_	_	_	_	_	_	_	_	_	_	0.246198	_	2.88782	_	_	_	4.42108	_	_	_	_	_	0.365065	0.4514	_	_	_	_	4.5198	0.867282	0.115351	_	0.214935	_	_	0.789587
57	White-sided dolphin	Liver	20.24	Les Bergeronnes	384.385	_	_	_	0.648145	_	_	_	_	_	_	_	0.209868	_	_	_	_	_	_	0.228824	_	0.481286	_	_	_	12.6906	_	_	_	_	_	1.66739	3.10372	_	_	_	_	13.4172	2.2781	0.24144	_	0.968693	_	_	2.95058
58	True's beaked whale	Liver	690	Sept-Îles	105.624	_	_	_	0.948069	_	_	_	_	_	_	_	_	_	_	_	_	_	_	0.116086	_	0.71194	_	_	_	0.150915	_	_	_	_	_	0.217616	0.160528	_	_	_	_	3.80217	_	_	_	0.1826	_	_	2.37543
59	Harbor seal	Liver	23	Rimouski	158.463	_	_	_	0.66585	_	_	_	_	_	_	_	_	_	_	_	_	_	_	_	_	_	_	_	_	0.106242	_	_	_	_	_	1.02847	0.293748	_	_	_	_	5.50704	_	_	_	0.245593	_	_	0.215983
60	Harbor porpoise	Liver	8.94	Sainte-Anne-des-Monts	394.978	_	_	_	1.9459	_	_	_	_	_	_	_	_	_	_	_	_	_	_	0.196776	_	0.524575	_	_	_	0.117807	_	_	_	_	_	0.636277	1.33353	_	_	_	_	10.6875	6.89067	0.460393	_	0.790398	_	_	0.0896019
61	White-sided dolphin	Liver	17.6	Saint-Ulric	284.195	_	_	_	1.61376	_	_	_	_	_	_	_	_	_	_	_	_	_	_	_	_	_	_	_	_	_	_	_	_	_	_	0.18853	0.895862	_	_	_	_	8.2192	1.28985	_	_	0.39592	_	_	0.653913
62	Harbor porpoise	Liver	18	Rivière-Ouelle	337.242	_	_	_	0.778998	_	_	_	_	_	_	_	_	_	_	_	_	_	_	_	_	0.281675	_	_	_	5.13507	_	_	_	_	_	0.168137	0.695228	_	_	_	_	9.44032	0.607552	0.180269	_	0.464184	_	_	0.127342
63	Harbor porpoise	Liver	10	Les Escoumins	199.822	_	1.58765	_	2.46405	_	_	_	_	_	_	_	_	_	_	_	_	_	_	0.155321	_	0.37409	_	_	_	_	_	_	_	_	_	0.459993	0.166744	_	_	_	_	8.3027	2.03404	0.0900161	_	0.142395	_	_	_
64	Harbor seal	Liver	8.08	Sept-Îles	140.007	_	_	_	0.440986	_	_	_	_	_	_	_	_	_	_	_	_	_	_	_	_	_	_	_	_	_	_	_	_	_	_	0.596367	0.234063	_	_	_	_	6.55645	_	_	_	0.156364	_	_	0.0717517
65	White-sided dolphin	Liver	20.8	Matane	377.588	_	_	_	0.651056	_	_	_	_	_	_	_	_	_	_	_	0.071017	_	_	0.311216	_	0.40557	_	_	_	0.0827882	_	_	_	_	_	1.55902	1.81035	_	_	_	_	11.2894	3.95461	0.18907	_	0.752287	_	_	2.24332
66	Harbor porpoise	Liver	10.62	Rimouski	358.839	_	_	_	_	0.250033	_	_	_	_	_	_	_	_	_	_	_	_	_	0.237618	_	0.459353	_	_	_	0.0571732	_	_	_	_	_	0.634163	0.659777	_	_	_	_	6.6316	3.40716	0.348845	_	0.416772	_	_	0.157476
67	Harbor porpoise	Liver	82.57	Sainte-Anne-des-Monts	110.66	_	_	_	0.54	_	_	_	_	_	_	_	_	_	_	_	_	_	_	_	_	0.265681	_	_	_	_	_	_	_	_	_	_	0.16175	_	_	_	_	4.62917	_	_	_	_	_	_	_
68	Harbor porpoise	Liver	11.52	Les Escoumins	343.508	_	_	_	2.18129	_	_	_	_	_	_	_	_	_	_	_	_	_	_	_	_	1.36655	_	_	_	0.0717722	_	_	_	_	_	0.148776	1.24246	_	_	_	_	5.72592	10.2681	0.238702	_	0.478432	_	_	0.750972
69	Harbor porpoise	Liver	10.86	Rimouski	350.155	_	_	_	0.991859	_	_	_	_	_	_	_	_	_	_	_	_	_	_	0.165117	_	0.835813	_	_	_	0.062459	_	_	_	_	_	0.680881	0.787925	_	_	_	_	10.7676	1.48835	0.48381	_	0.483634	_	_	0.251163
70	White-sided dolphin	Liver	47.68	Percé	339.743	_	_	_	2.0988	_	_	_	_	_	_	_	_	_	_	_	_	_	_	_	_	1.01029	_	_	_	0.11175	_	_	_	_	_	0.463338	1.45235	_	_	_	_	6.36522	_	0.289137	_	0.65831	_	_	4.79836
71	Harbor porpoise	Liver	13.32	Rivière-du-Loup	669.506	_	0.469389	_	0.765069	_	_	_	_	_	_	_	_	_	_	_	_	_	_	0.0763003	_	2.94941	_	_	_	_	_	_	_	_	_	0.391629	2.61775	_	_	_	_	18.7902	1.47293	2.02423	_	1.54805	_	_	3.72145
72	Harbor porpoise	Liver	12.58	Port-Cartier	234.756	_	2.4386	_	1.59204	_	_	_	_	_	_	_	_	_	_	_	_	_	_	_	_	0.239185	_	_	_	11.2543	_	_	_	_	_	_	0.770786	_	_	_	_	3.34565	3.11535	0.20139	_	0.492035	_	_	0.0933495
73	White-sided dolphin	Liver	27	Sept-Îles	343.4	_	_	_	0.423607	_	_	_	_	_	_	_	_	_	_	_	_	_	_	0.214267	_	0.298028	_	_	_	0.0878513	_	_	_	_	_	0.578247	1.34415	_	_	_	_	11.9653	_	0.162541	_	0.570022	_	_	2.05363
74	Harbor porpoise	Liver	38	Havre-Saint-Pierre	156.882	_	_	_	0.860612	0.170376	_	_	_	_	_	_	_	_	_	_	_	_	_	0.145316	_	2.13354	_	_	_	_	_	_	_	_	_	0.0989759	0.129573	_	_	_	_	2.1841	_	0.0764478	_	0.101413	_	_	0.245769
75	Harp seal	Liver	37	Matane	44.2606	_	1.15859	_	1.71053	_	_	_	_	_	_	_	_	_	_	_	_	_	_	_	_	_	_	_	_	_	_	_	_	_	_	_	0.284546	_	_	_	_	4.89261	_	_	_	0.0868528	_	_	_
76	Harbor seal	Liver	46	Sainte-Félicité	128.062	_	_	_	0.389586	_	_	_	_	0.129686	_	_	_	_	_	_	_	_	_	_	_	0.103337	_	_	_	22.2675	_	_	_	_	_	0.345137	0.215364	_	_	_	_	5.04402	_	0.123392	_	0.148635	_	_	0.104609
77	Harbor porpoise	Liver	15	Rimouski	435.543	_	_	_	1.11285	_	_	_	_	_	_	_	_	_	_	_	_	_	_	_	_	1.82257	_	_	_	_	_	_	_	_	_	_	0.636742	_	_	_	_	4.37451	6.34441	0.365441	_	0.43128	_	_	0.378461
[truncated: 36 more columns]
